# Supplementary material
Source: publisher figshare collection journal article supplement (https://sage.figshare.com/ndownloader/files/24045023)

## Supplementary material

Supplementary Information on Sample Preparation: The blood samples were stored in a cooler during transport to the laboratory. The samples were centrifuged within 30 minutes (mins) after collection and plasma was stored at -80 °C. One hundred microliters (µl) of plasma were extracted with 400 µl of methanol. The extraction was performed by shaking at 1000 revolutions per minute (rpm) for 2 mins using a Geno/Grinder 2010 (SPEX SamplePrep., Metuchen, NJ, US). Then, the extract was centrifuged at 15,000 relative centrifugal force (rcf) for 5 mins at 4°C using an Eppendorf Centrifuge 5810R (Eppendorf AG, Hamburg, Germany). The supernatant was collected into an Eppendorf tube and evaporated using an EYELA CVE-200D Centrifugal Evaporator (TOKYO RIKAKIKAI CO., Tokyo, JP). The residue was re-reconstituted in 50% methanol. The reconstituted sample was sonicated for 10 mins and centrifuged at 15,000 rcf for 5 mins at 4°C. The supernatant was filtered through a 0.2 µm Minisart RC 4 filter (Sartorius Stedim Biotech GmbH, Goettingen, Germany) and underwent liquid chromatography-mass spectrometry (LC-MS) analysis.

Metabolomics profiling was performed using an Agilent 1290 UHPLC system coupled with an Agilent 6540 Q-TOF mass spectrometry (Agilent Technologies, Santa Clara, CA). Two microliters of the plasma extract were injected into an Acquity HSS T3 analytic column (2.1x100mm, 1.8µm) (Waters, Milford, MA) that was maintained at 40°C. The mobile phase was composed of solvent A (water/0.1% formic acid) and solvent B (acetonitrile/0.1% formic acid). The gradient elution program was as follows: 0-1.5 min: 2% B; 1.5-9 min: linear gradient from 2% to 50% B; 9-14 min: linear gradient from 50% to 95% B; and 3 min maintenance of 95% B. The flow rate was 300 µL min<sup>-1</sup>.

Supplementary Table 1 – 54 metabolites tested using MetaboAnalyst

| Compound name              | HMDB        | KEGG   |
|----------------------------|-------------|--------|
| (R)-3-Hydroxybutyric acid  | HMDB0000011 | C01089 |
| (S)-3-Hydroxybutyric acid  | HMDB0000442 | C03197 |
| 1-Methyladenosine          | HMDB0003331 | C02494 |
| 2-Hydroxybutyric acid      | HMDB0000008 | C05984 |
| 2-Ketohexanoic acid        | HMDB0001864 | C00902 |
| 2-Oxoglutarate             | HMDB0000208 | C00026 |
| 3-Hydroxyisovaleric acid   | HMDB0000754 |        |
| 4-Methoxyphenylacetic acid | HMDB0002072 |        |
| 5-Aminolevulinic acid      | HMDB0001149 | C00430 |
| 5-Methylcytidine           | HMDB0000982 |        |
| Allose                     | HMDB0001151 | C01487 |
| Ascorbic Acid              | HMDB0000044 | C00072 |
| Carnitine                  | HMDB0000062 | C00318 |
| Catechol                   | HMDB0000957 | C00090 |
| cis-Aconitate              | HMDB0000072 | C00417 |
| citric acid                | HMDB0000094 | C00158 |
| Decanoylcarnitine          | HMDB0000651 |        |
| Deoxycholic acid           | HMDB0000626 | C04483 |
| D-Fructose                 | HMDB0000660 | C02336 |
| D-Glucurono-6,3-lactone    | HMDB0006355 | C02670 |
| D-Galactose                | HMDB0000143 | C00984 |
| D-Mannose                  | HMDB0000169 | C00159 |
| D-Tagatose                 | HMDB0003418 | C00795 |
| D-threo-Isocitric acid     | HMDB0001874 | C00451 |
| Glycerophosphocholine      | HMDB0000086 | C00670 |
| Hexanoylcarnitine          | HMDB0000705 |        |
| Hydroxyoctanoic acid       | HMDB0000711 |        |
| Hydroxyphenyllactic acid   | HMDB0000755 | C03672 |
| Hyodeoxycholic acid        | HMDB0000733 |        |
| Hypoxanthine               | HMDB0000157 | C00262 |
| Indolelactic acid          | HMDB0000671 | C02043 |
| Ketoleucine                | HMDB0000695 | C00233 |
| L-3-Phenyllactic acid      | HMDB0000748 | C05607 |
| L-Acetylcarnitine          | HMDB0000201 | C02571 |

|                            |             |        |
|----------------------------|-------------|--------|
| Lactate                    | HMDB0000190 | C00186 |
| L-Alloisoleucine           | HMDB0000557 |        |
| L-Isoleucine               | HMDB0000172 | C00407 |
| Levulinic acid             | HMDB0000720 |        |
| L-Kynurenine               | HMDB0000684 | C00328 |
| L-Norleucine               | HMDB0001645 | C01933 |
| Malic Acid                 | HMDB0000744 | C00711 |
| Methionine                 | HMDB0000696 | C00073 |
| N6-Acetyl-L-lysine         | HMDB0000206 | C02727 |
| Paraxanthine               | HMDB0001860 | C13747 |
| Phenylalanine              | HMDB0000159 | C00079 |
| Pipecolic acid             | HMDB0000070 | C00408 |
| Pyroglutamic acid          | HMDB0000267 | C01879 |
| Pyrrolidonecarboxylic acid | HMDB0000805 | C02237 |
| Pyruvic acid               | HMDB0000243 | C00022 |
| Spermine                   | HMDB0001256 | C00750 |
| Succinate                  | HMDB0000254 | C00042 |
| Tetradecanedioic acid      | HMDB0000872 | C11002 |
| Tyrosine                   | HMDB0000158 | C00082 |
| Uridine                    | HMDB0000296 | C00299 |

*Note.* HMDB = Human Metabolome Database; KEGG = Kyoto Encyclopedia of Genes and Genomes

Supplementary Table 2 – Fold Change

| Compound name              | Marker | Fold Change | log <sub>2</sub> (FC) | KEGG   | HMDB        |
|----------------------------|--------|-------------|-----------------------|--------|-------------|
| Spermine                   | A      | 7.2889      | 2.8657                | C00750 | HMDB0001256 |
| Pyrrolidonecarboxylic acid | B      | 0.32446     | -1.6239               | C02237 | HMDB0000805 |
| Hydroxyoctanoic acid       | C      | 2.5006      | 1.3223                |        | HMDB0000711 |
| Paraxanthine               | D      | 0.48379     | -1.0475               | C13747 | HMDB0001860 |

*Note.* FC = fold change; HMDB = Human Metabolome Database; KEGG = Kyoto Encyclopedia of Genes and Genomes

Supplementary Figure 1. Illustration of the fold change analysis. The marker A is spermine, marker B is pyrrolidonecarboxylic acid, marker C is hydroxyoctanoic acid, and marker D is paraxanthine.

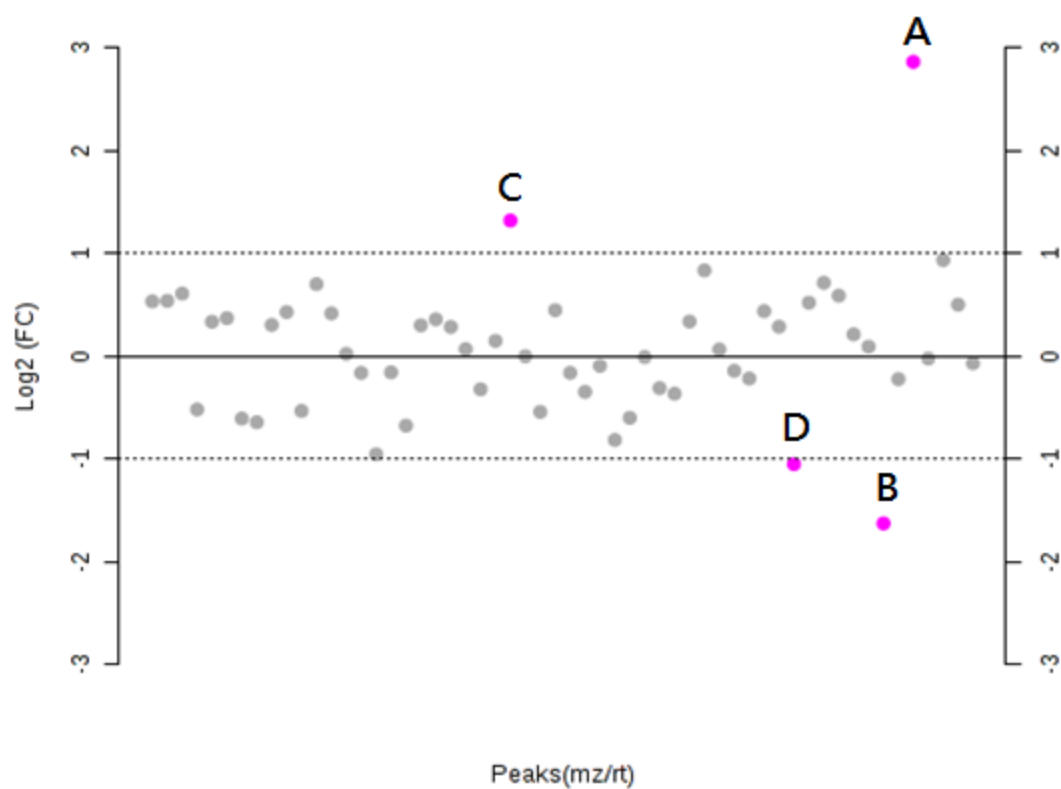

Supplement: Supplementary file 1 [file 24045023]
